# Supplementary material for: Use of Oral Anticoagulation in a Real‐World Population With Device Detected Atrial Fibrillation
Source: PubMed Central journal article supplement — J Am Heart Assoc. 2020 Nov 30;9(24):e018378. doi: 10.1161/JAHA.120.018378 (PMC7955365; doi:10.1161/jaha.120.018378), 2020-11-30

# **SUPPLEMENTAL MATERIAL**

**Table S1. Diagnosis codes for computation of CHA<sub>2</sub>DS<sub>2</sub>-VASc score.**

| <b>Disease state</b>                   | <b>ICD-9 or ICD-10 diagnosis codes</b>                                                                    |
|----------------------------------------|-----------------------------------------------------------------------------------------------------------|
| Hypertension                           | 401.X, 402.X, 404.X, 403.X, 405.X, I10.X, I11.X, I12.X, I13.X, I15.X                                      |
| Diabetes                               | 250.X0, 250.X2, E11.X, 250.X1, 250.X3, E10.X                                                              |
| Heart failure                          | 428.X, 402.01, 402.11, 402.91, 404.01, 404.03, 404.11, 404.13, 404.91, 404.93, I50.X, I11.0, I13.0, I13.2 |
| Ischemic stroke/ TIA                   | 433.X, 434.X, 436.X, I63.X, I65.X, I66.X,<br>435.X, G45.0, G45.1, G45.2, G45.8, G45.9, Z86.73, V12.54     |
| Vascular diseases (PAD, aortic plaque) | 440.2X, 443.9, I70.2X, I73.9, 440.0, I70.0                                                                |
| Myocardial Infarction                  | 410.X, 412.X, I21.X, I22.X, I23.X, I25.2                                                                  |
| Atrial Fibrillation                    | 427.31, I48.0, I48.1, I48.2, I48.91                                                                       |

Figure S1. Percentage of patients on oral anticoagulation by CHADS<sub>2</sub> score.

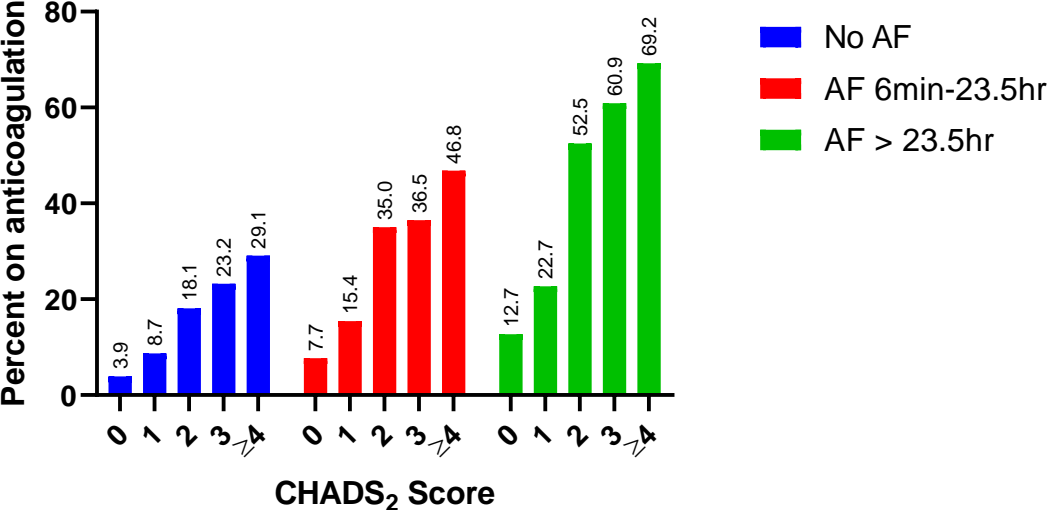

Figure S2. Rates of oral anticoagulation across geographical regions by CHADS<sub>2</sub> score for patients with no AF (A), AF duration 6 minutes-23.5 hours (B), and AF duration >23.5 hours (C).

A: No AF

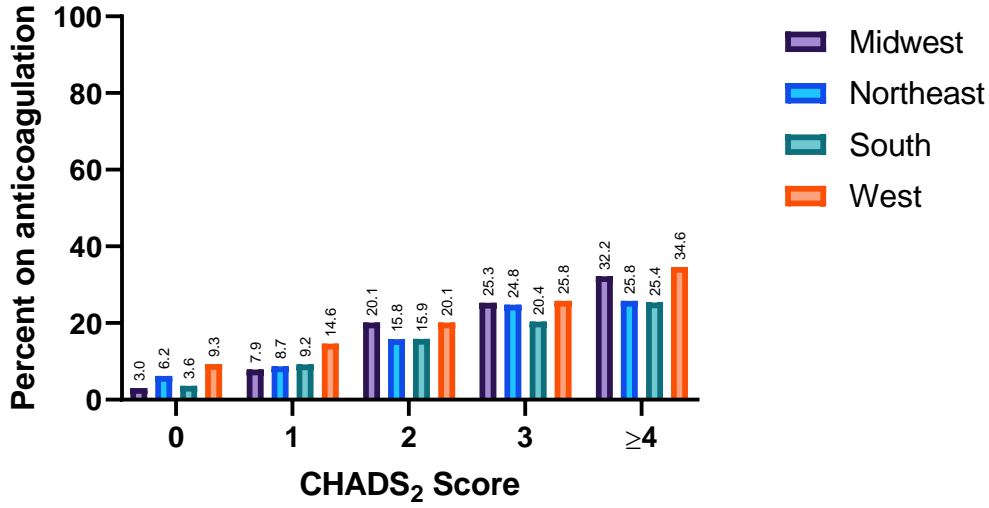

B: AF duration 6 minutes-23.5 hours

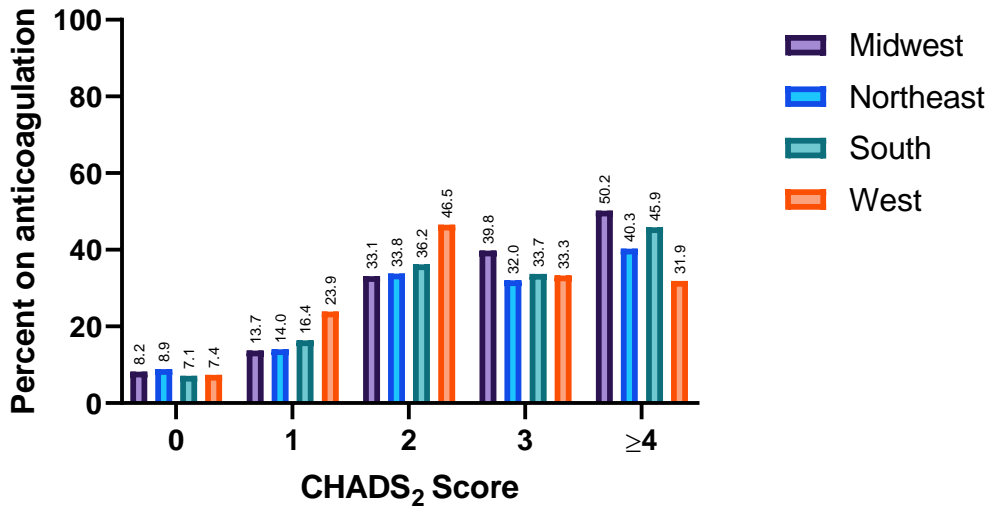

C: AF duration >23.5 hours

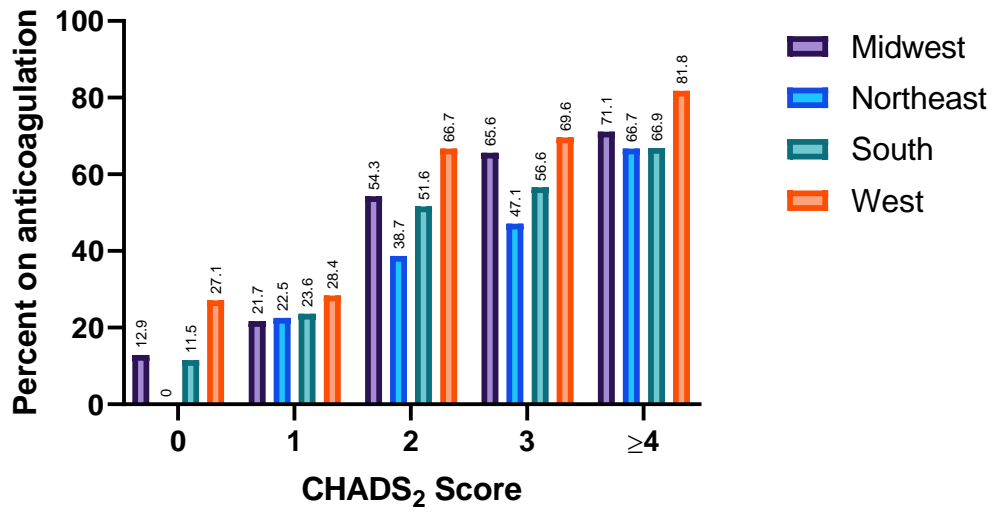

Supplement: JAH3-9-e018378-s001.pdf [file JAH3-9-e018378-s001.pdf]
